# Supplementary material for: The Ala54Thr Polymorphism of the Fatty Acid Binding Protein 2 Gene Modulates HDL Cholesterol in Mexican-Americans with Type 2 Diabetes
Source: PubMed Central journal article supplement (PMC4730443; doi:10.3390/ijerph13010052), 2015-12-23
Supplement: ijerph-13-00052-s001.pdf [file ijerph-13-00052-s001.pdf]

# Supplementary Materials: The *Ala54Thr* Polymorphism of the Fatty Acid Binding Protein 2 Gene Modulates HDL Cholesterol in Mexican-Americans with Type 2 Diabetes

Lorena M. Salto, Liming Bu, W. Lawrence Beeson, Anthony Firek, Zaida Cordero-MacIntyre and Marino De Leon

**Table S1.** Baseline to three-month *En Balance* participant changes for the combined group ( $n = 43$ ).

|                               | Baseline          | Three-Month       | Mean Difference | <i>p</i> -Value <sup>a</sup> |
|-------------------------------|-------------------|-------------------|-----------------|------------------------------|
|                               | Mean $\pm$ SD     | Mean $\pm$ SD     | $\pm$ SD        |                              |
| Fasting Blood Glucose (mg/dl) | 162.5 $\pm$ 73.4  | 143.1 $\pm$ 58.8  | 19.5 $\pm$ 46.1 | 0.008 *                      |
| HbA1c (%)                     | 8.1 $\pm$ 2.5     | 7.3 $\pm$ 1.8     | 0.79 $\pm$ 1.51 | 0.001 *                      |
| Insulin (uU/mL)               | 14.1 $\pm$ 9.9    | 15.2 $\pm$ 12.7   | 1.13 $\pm$ 7.35 | 0.319                        |
| HOMA-IR <sup>b</sup>          | 4.85 $\pm$ 2.86   | 4.29 $\pm$ 2.49   | 0.57 $\pm$ 2.26 | 0.119                        |
| Total Cholesterol (mg/dl)     | 187.5 $\pm$ 40.8  | 176.3 $\pm$ 49.8  | 11.1 $\pm$ 34.6 | 0.041 *                      |
| HDL Cholesterol (mg/dl)       | 46.1 $\pm$ 10.4   | 46.1 $\pm$ 10.2   | 0.07 $\pm$ 6.86 | 0.947                        |
| LDL Cholesterol (mg/dl)       | 115.9 $\pm$ 33.4  | 106.9 $\pm$ 36.2  | 8.9 $\pm$ 27.8  | 0.042 *                      |
| Cholesterol: HDL ratio        | 4.2 $\pm$ 1.1     | 3.9 $\pm$ 1.1     | 0.27 $\pm$ 0.75 | 0.022 *                      |
| Triglycerides (mg/dl)         | 207.6 $\pm$ 121.7 | 189.8 $\pm$ 118.2 | 17.8 $\pm$ 82.9 | 0.167                        |
| BIA: Fat Mass (kg)            | 33.7 $\pm$ 13.3   | 31.9 $\pm$ 13.1   | 1.7 $\pm$ 3.1   | 0.001 *                      |
| BIA: Fat %                    | 39.8 $\pm$ 9.3    | 38.3 $\pm$ 9.2    | 1.45 $\pm$ 2.35 | <0.001 *                     |
| BIA: Fat-free Mass (kg)       | 48.2 $\pm$ 9.4    | 48.8 $\pm$ 9.4    | 0.57 $\pm$ 1.67 | 0.038 *                      |
| Weight (kg)                   | 81.3 $\pm$ 18.3   | 80.9 $\pm$ 17.9   | 0.41 $\pm$ 2.59 | 0.317                        |
| Waist Circumference (cm)      | 100.4 $\pm$ 13.4  | 98.7 $\pm$ 13.2   | 1.66 $\pm$ 5.24 | 0.055                        |
| Hip Circumference (cm)        | 110.8 $\pm$ 15.6  | 110.6 $\pm$ 14.6  | 0.20 $\pm$ 3.36 | 0.695                        |
| Waist to Hip Ratio            | 0.91 $\pm$ 0.07   | 0.89 $\pm$ 0.06   | 0.01 $\pm$ 0.05 | 0.067                        |
| BMI (kg/m <sup>2</sup> )      | 32.5 $\pm$ 7.1    | 32.0 $\pm$ 6.9    | 0.42 $\pm$ 1.04 | 0.012 *                      |
| DXA: Trunk Fat (kg)           | 16.2 $\pm$ 6.5    | 15.8 $\pm$ 6.3    | 0.40 $\pm$ 1.05 | 0.015 *                      |
| DXA: Trunk Lean (kg)          | 25.5 $\pm$ 4.8    | 25.4 $\pm$ 4.9    | 0.02 $\pm$ 1.04 | 0.885                        |
| DXA: Trunk Percent Fat (%)    | 37.4 $\pm$ 8.9    | 36.9 $\pm$ 8.7    | 0.52 $\pm$ 1.72 | 0.043 *                      |
| DXA: Total Fat (kg)           | 31.0 $\pm$ 12.4   | 30.4 $\pm$ 12.0   | 0.64 $\pm$ 1.61 | 0.013 *                      |
| DXA: Total Lean (kg)          | 49.2 $\pm$ 9.9    | 49.2 $\pm$ 10.2   | 0.05 $\pm$ 1.60 | 0.838                        |
| DXA: Total Percent Fat (%)    | 36.9 $\pm$ 9.0    | 36.4 $\pm$ 9.0    | 0.45 $\pm$ 1.19 | 0.018*                       |

BIA = bioelectrical impedance analysis; BMI= body mass index; DXA = dual-energy X-ray absorptiometry;

<sup>a</sup> This *p*-value is based on paired-samples *t*-test or Wilcoxon signed-ranks test comparing baseline to three-month changes; \* *p*-value < 0.05; <sup>b</sup> Homeostasis Model Assessment of Insulin Resistance (HOMA-IR) = [fasting insulin (mU/L)  $\times$  fasting glucose (mmol/L)] / 22.5.

**Table S2.** Results of linear regression analyses of baseline marker levels adjusted for the *Ala54Thr* polymorphism <sup>a</sup> on primary endpoint changes ( $\Delta^b$ ), ( $n = 43$ ).

| Linear Regression Model ( $\hat{Y} = \alpha + \beta X_1 + \beta X_2 + \epsilon_i$ )                              | Baseline Marker               | Baseline Marker <i>p</i> -value <sup>c</sup> | <i>Ala54Thr</i> <i>p</i> -Value |
|------------------------------------------------------------------------------------------------------------------|-------------------------------|----------------------------------------------|---------------------------------|
| $\Delta\text{FBG} = \alpha + \beta\text{FBG\_bl} + \beta\text{Ala54Thr\_group} + \epsilon_i$                     | Fasting Blood Glucose (mg/dl) | <0.001 *                                     | 0.958                           |
| $\Delta\text{HbA1c} = \alpha + \beta\text{HbA1c\_bl} + \beta\text{Ala54Thr\_group} + \epsilon_i$                 | HbA1c (%)                     | <0.001 *                                     | 0.231                           |
| $\Delta\text{Insulin} = \alpha + \beta\text{Insulin\_bl} + \beta\text{Ala54Thr\_group} + \epsilon_i$             | Insulin (uU/mL)               | 0.607                                        | 0.550                           |
| $\Delta\text{HOMA-IR} = \alpha + \beta\text{HOMA-IR\_bl} + \beta\text{Ala54Thr\_group} + \epsilon_i$             | HOMA-IR                       | <0.001 *                                     | 0.513                           |
| $\Delta\text{Cholest.} = \alpha + \beta\text{Cholest\_bl} + \beta\text{Ala54Thr\_group} + \epsilon_i$            | Total Cholesterol (mg/dl)     | 0.406                                        | 0.856                           |
| $\Delta\text{HDL} = \alpha + \beta\text{HDL\_bl} + \beta\text{Ala54Thr\_group} + \epsilon_i$                     | HDL Cholesterol (mg/dl)       | 0.070                                        | 0.421                           |
| $\Delta\text{LDL} = \alpha + \beta\text{LDL\_bl} + \beta\text{Ala54Thr\_group} + \epsilon_i$                     | LDL Cholesterol (mg/dl)       | 0.047 *                                      | 0.939                           |
| $\Delta\text{Chol:HDL} = \alpha + \beta\text{Chol:HDL\_bl} + \beta\text{Ala54Thr\_group} + \epsilon_i$           | Cholesterol: HDL ratio        | 0.064                                        | 0.509                           |
| $\Delta\text{Trig.} = \alpha + \beta\text{Trig\_bl} + \beta\text{Ala54Thr\_group} + \epsilon_i$                  | Triglycerides (mg/dl)         | 0.013 *                                      | 0.888                           |
| $\Delta\text{BIAFM} = \alpha + \beta\text{BIAFM\_bl} + \beta\text{Ala54Thr\_group} + \epsilon_i$                 | BIA: Fat Mass (kg)            | 0.297                                        | 0.589                           |
| $\Delta\text{BIAFat\%} = \alpha + \beta\text{BIAFat\%\_bl} + \beta\text{Ala54Thr\_group} + \epsilon_i$           | BIA: Fat %                    | 0.359                                        | 0.786                           |
| $\Delta\text{BIAFFM} = \alpha + \beta\text{BIAFFM\_bl} + \beta\text{Ala54Thr\_group} + \epsilon_i$               | BIA: Fat Free Mass (kg)       | 0.635                                        | 0.899                           |
| $\Delta\text{Wt} = \alpha + \beta\text{Wt\_bl} + \beta\text{Ala54Thr\_group} + \epsilon_i$                       | Weight (kg)                   | 0.147                                        | 0.946                           |
| $\Delta\text{WC} = \alpha + \beta\text{WC\_bl} + \beta\text{Ala54Thr\_group} + \epsilon_i$                       | Waist Circumference (cm)      | 0.138                                        | 0.829                           |
| $\Delta\text{HC} = \alpha + \beta\text{HC\_bl} + \beta\text{Ala54Thr\_group} + \epsilon_i$                       | Hip Circumference (cm)        | 0.007 *                                      | 0.416                           |
| $\Delta\text{W2H} = \alpha + \beta\text{W2H\_bl} + \beta\text{Ala54Thr\_group} + \epsilon_i$                     | Waist to Hip Ratio            | <0.001 *                                     | 0.610                           |
| $\Delta\text{BMI} = \alpha + \beta\text{BMI\_bl} + \beta\text{Ala54Thr\_group} + \epsilon_i$                     | BMI (kg/m <sup>2</sup> )      | 0.120                                        | 0.943                           |
| $\Delta\text{DXATrunkFat} = \alpha + \beta\text{DXATrunkFat\_bl} + \beta\text{Ala54Thr\_group} + \epsilon_i$     | DXA: Trunk Fat (kg)           | 0.065                                        | 0.899                           |
| $\Delta\text{DXATrunkLean} = \alpha + \beta\text{DXATrunkLean\_bl} + \beta\text{Ala54Thr\_group} + \epsilon_i$   | DXA: Trunk Lean (kg)          | 0.787                                        | 0.670                           |
| $\Delta\text{DXATrunk\%Fat} = \alpha + \beta\text{DXATrunk\%Fat\_bl} + \beta\text{Ala54Thr\_group} + \epsilon_i$ | DXA: Trunk Percent Fat (%)    | 0.145                                        | 0.354                           |
| $\Delta\text{DXATotalFat} = \alpha + \beta\text{DXATotalFat\_bl} + \beta\text{Ala54Thr\_group} + \epsilon_i$     | DXA: Total Fat (kg)           | 0.077                                        | 0.953                           |
| $\Delta\text{DXATotalLean} = \alpha + \beta\text{DXATotalLean\_bl} + \beta\text{Ala54Thr\_group} + \epsilon_i$   | DXA: Total Lean (kg)          | 0.290                                        | 0.716                           |
| $\Delta\text{DXATotal\%Fat} = \alpha + \beta\text{DXATotal\%Fat\_bl} + \beta\text{Ala54Thr\_group} + \epsilon_i$ | DXA: Total Percent Fat (%)    | 0.622                                        | 0.581                           |

<sup>a</sup> Ala/Ala (*Ala54* homozygotes, G/G genotype) vs. Ala/Thr and Thr/Thr (*Thr54* allele carriers, G/A and A/A genotypes combined); <sup>b</sup>  $\Delta$ : Three-month -Baseline Change; <sup>c</sup> This *p*-value is based on the effect of the baseline marker as a predictor of the dependent change variable using the linear regression model shown; \* *p*-value < 0.05.
